# Supplementary material for: Hierarchical hollow structured NixCo3−xO4 particles for high-performance hybrid supercapacitors with ultralong cyclic stability
Source: Royal Society of Chemistry journal article supplement (doi:10.1039/d0se01852j), 2021-01-01
Supplement: d0se01852j1.pdf [file d0se01852j1.pdf]

## Supplementary Information

### **Hierarchical hollow structure of Ni<sub>x</sub>Co<sub>3-x</sub>O<sub>4</sub> particles for high-performance hybrid supercapacitors with excellent cyclic stability**

Fanggang Li,<sup>a</sup> Maojun Zheng,<sup>\*ab</sup> Wenlan Zhang,<sup>a</sup> Yuxiu You,<sup>a</sup> Dongkai Jiang,<sup>a</sup> Hao Yuan,<sup>a</sup> Li Ma,<sup>c</sup> Wenzhong Shen,<sup>ab</sup>

<sup>a</sup> Key Laboratory of Artificial Structures and Quantum Control (Ministry of Education), School of Physics and Astronomy, Shanghai Jiao Tong University, Shanghai 200240, China.

<sup>b</sup> Collaborative Innovation Center of Advanced Microstructures, Nanjing University, Nanjing 210093, China

<sup>c</sup> School of Chemistry and Chemical Technology, Shanghai Jiao Tong University, Shanghai 200240, China.

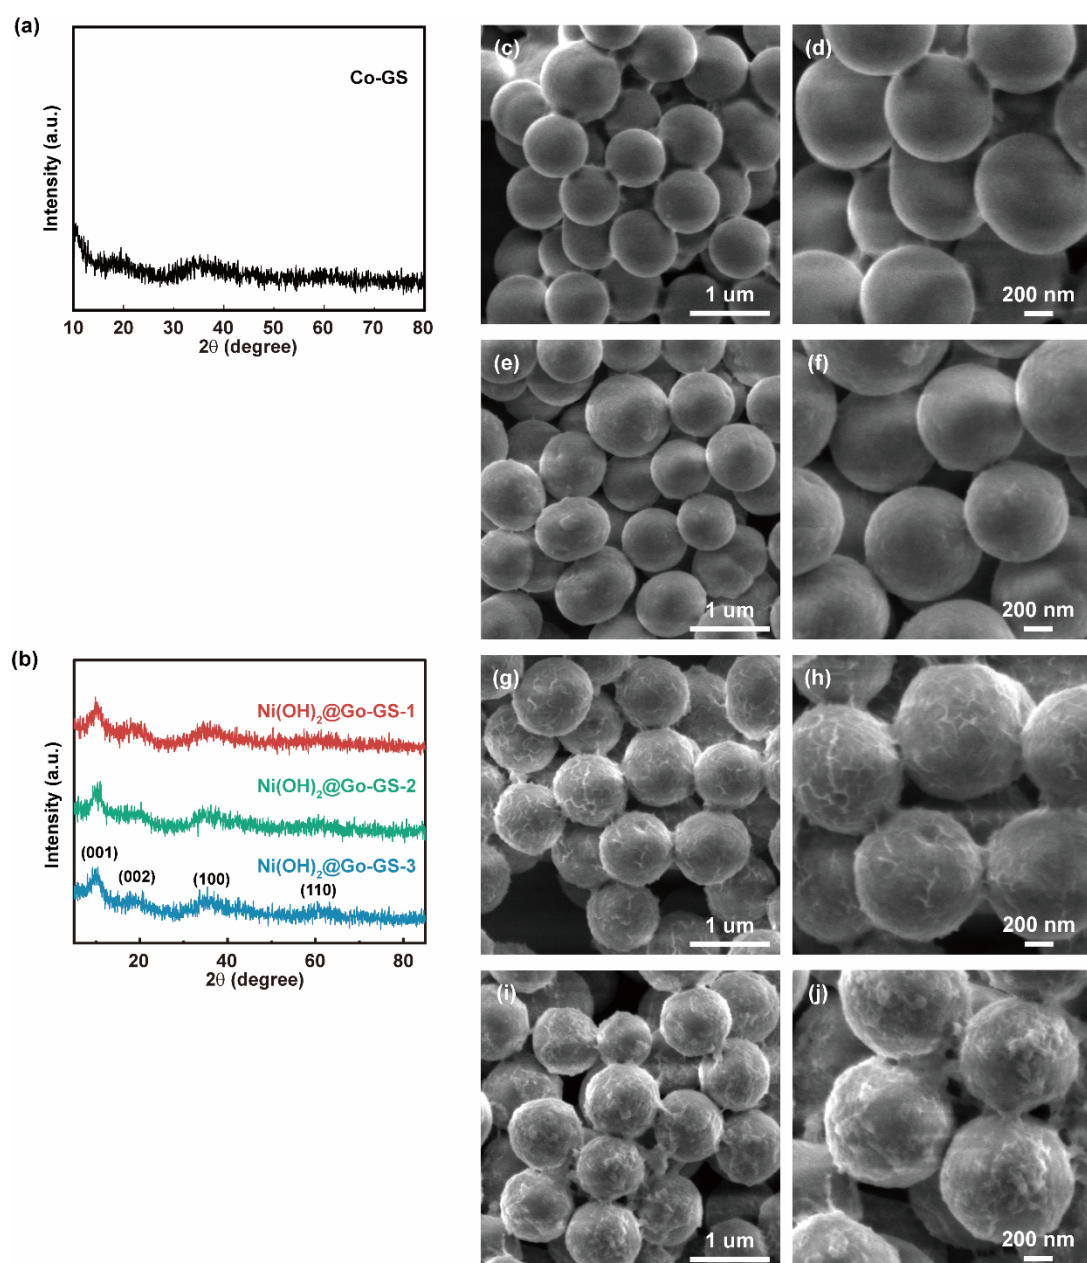

**Figure S1** (a, b) XRD diffraction pattern of Co-GSs and Ni(OH)<sub>2</sub>@Co-GS; SEM images of (c, d) Co-GSs; (e, f) Ni(OH)<sub>2</sub>@Co-GS-1; (g, h) Ni(OH)<sub>2</sub>@Co-GS-2; (i, j) Ni(OH)<sub>2</sub>@Co-GS-3.

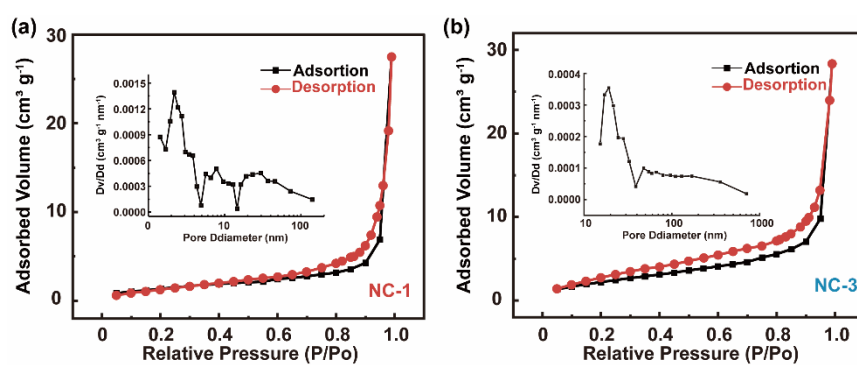

**Figure S2** N<sub>2</sub> adsorption-desorption isotherms and corresponding pore size distribution (inset) of (a) NC-HHP-1 and (b) NC-HHP-3.

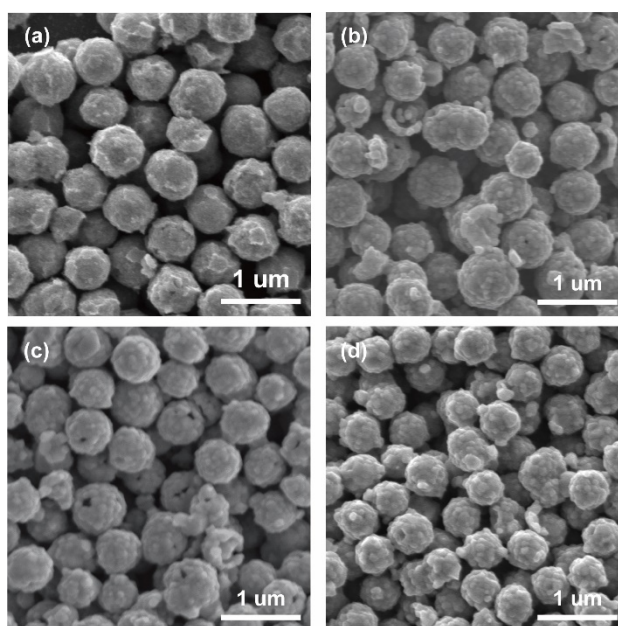

**Figure S3** SEM images of NC-HHP-2 at different annealing temperatures: (a) 300 °C; (b) 400 °C; (c) 500 °C; (d) 600 °C.

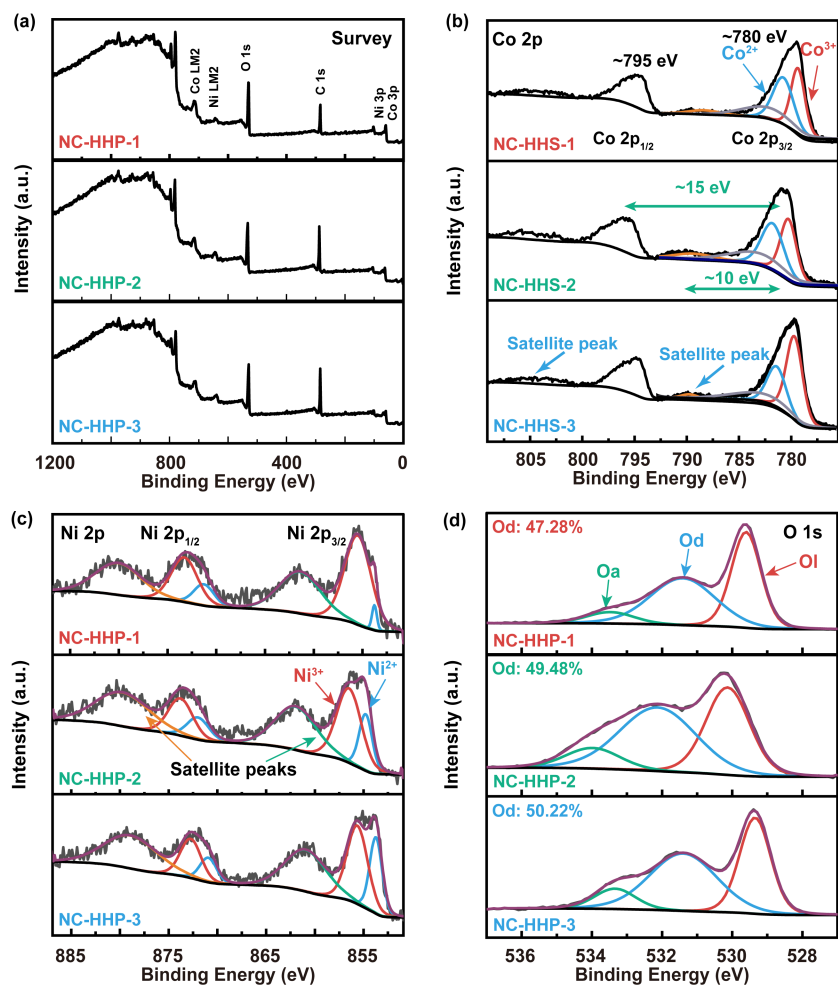

Figure S4 XPS spectra of NC-HHPs.

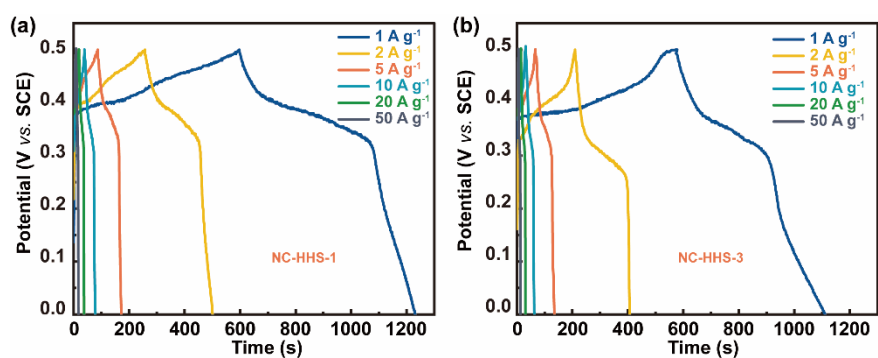

Figure S5 GCD curves of (a) NC-HHP-1 and (b) NC-HHP-3 at various current densities.

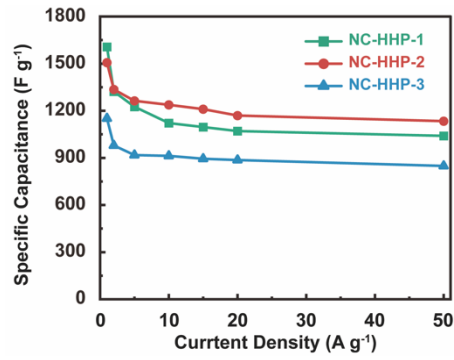

**Figure S6** Corresponding specific capacitance of NC-HHPs by using  $F g^{-1}$  as the unit.

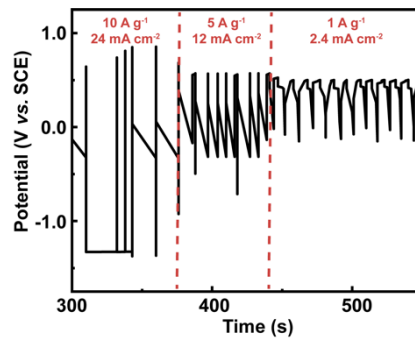

**Figure S7** GCD curves of the blank Ni foam sample at different current densities.

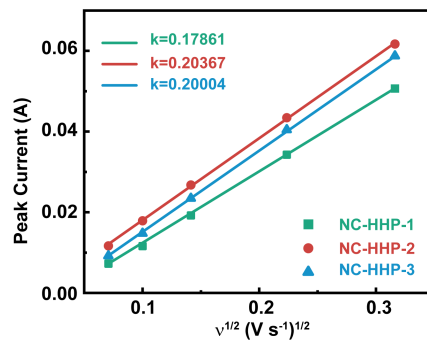

**Figure S8** Plot of peak current vs.  $v^{1/2}$  to calculate diffusion coefficient.

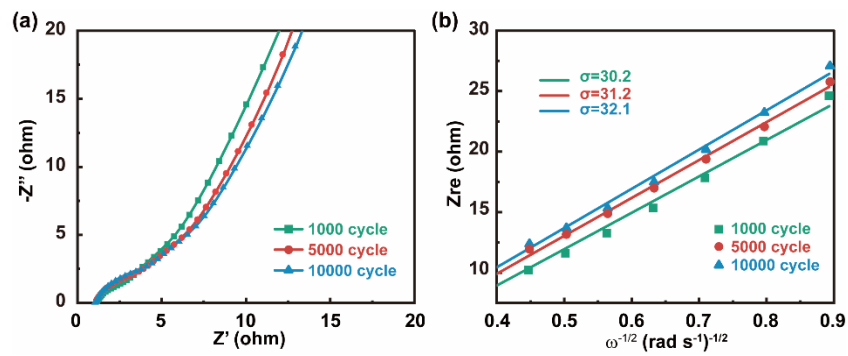

**Figure S9** (a) Nyquist plots of HSC device after different cycle; (b) the linear relationship between  $Z_{re}$  and  $\omega^{-1/2}$  of HSC device after different cycle.

## Method to calculate voltametric charge

Trasatti pioneered a method to quantify the surface contribution. As explained by Mousavi and Augustyn,<sup>1,2</sup> the voltammetric charge is related to the scan rate. The value of  $q(v)$  can be deconvoluted into two terms:  $q_{s,total}$  (surface-controlled) and  $q_d$  (diffusion-controlled). Then, the surface-controlled component can be further divided into two terms: (1) " $q_{s,out}$ ", represents the contribution of the outer surface of the electrode active material to the charge storage (more accessible position such as the region directly accessible to the electrolyte), which is invariant of sweep rate.<sup>1,2</sup> (2) " $q_{s,in}$ ", comes from the partially accessible sites (less accessible position such as pores, grain boundaries, and cracks), which is sweep rate dependent.<sup>1,2</sup>

When the scan rate tends to infinity, the part of  $q_{s,in}$  equals 0:

$$q = q_{s,out} + q_d \quad \text{A}$$

When the scan rate tends to 0:

$$q = q_{s,in} + q_{s,out} + q_d \quad \text{B}$$

With these boundary conditions,  $q_{s,in}$  and  $q_{s,out}$  can be calculated by plotting the relationship between the voltammetric charge and the scan rate as below:

(1)  $q_{s,out}$ : Assuming semi-infinite linear diffusion and a linear relationship between  $q_d$  and  $v^{-1/2}$ , when the scan rate tends to infinity, eq A can be rewritten as:  $q = q_{s,out} + k_1 v^{-1/2}$ . So when  $v$  tends to infinity, that is,  $v^{-1/2}$  tends to 0, using the relationship between  $q$  and  $v^{-1/2}$ , we can get the intercept, which is  $q_{s,out}$ .<sup>2</sup>

(2)  $q_{s,in}$ : Assuming  $q^{-1}$  decreases linearly with  $v^{1/2}$ , eq B can be rewritten as:

$q^{-1} = (q_{s,in} + q_{s,out})^{-1} + k_2 v^{1/2}$ . So when  $v$  tends to 0, that is,  $v^{1/2}$  tends to 0, using the relationship between  $q^{-1}$  and  $v^{1/2}$ , we can get the intercept, which is  $(q_{s,total})^{-1}$ .  $q_{s,in}$  then can be obtained by using eq:  $q_{s,total} = q_{s,in} + q_{s,out}$ .<sup>2</sup>

## References:

1. S. Fleischmann, J. B. Mitchell, R. Wang, C. Zhan, D. E. Jiang, V. Presser and V. Augustyn, *Chem Rev*, 2020, **120**, 6738-6782.
2. A. Noori, M. F. El-Kady, M. S. Rahmanifar, R. B. Kaner and M. F. Mousavi, *Chem Soc Rev*, 2019, **48**, 1272-1341.

**Table S1** ICP-OES results of NC-HHP.

| NC-HHP | Co (wt%) | Ni (wt%) | O (wt%) | Co (at%) | Ni (at%) | Ni (at%)/ Co (at%) |
|--------|----------|----------|---------|----------|----------|--------------------|
| 1      | 58.78    | 18.02    | 23.20   | 36.21    | 11.15    | 0.31               |
| 2      | 56.73    | 19.53    | 23.74   | 34.64    | 11.97    | 0.35               |
| 3      | 54.85    | 20.16    | 24.99   | 32.82    | 12.11    | 0.37               |

**Table S2** Specific surface area and pore size data for NC-HHP.

| NC-HHP | Surface Area                                   |                                               | Pore Size       |             |
|--------|------------------------------------------------|-----------------------------------------------|-----------------|-------------|
|        | Multi BET<br>(m <sup>2</sup> g <sup>-1</sup> ) | Langmuir<br>(m <sup>2</sup> g <sup>-1</sup> ) | Average<br>(nm) | BJH<br>(nm) |
| 1      | 5.3                                            | 9.2                                           | 32.0            | 2.2         |
| 2      | 12.8                                           | 22.5                                          | 89.3            | 17.0        |
| 3      | 8.8                                            | 14.9                                          | 99.6            | 19.1        |

**Table S3** XPS analysis results of NC-HHP.

| NC-HHP | Co | Ni   | O    |
|--------|----|------|------|
| 1      | 1  | 0.33 | 3.30 |
| 2      | 1  | 0.48 | 4.01 |
| 3      | 1  | 0.65 | 5.15 |

**Table S4** Parameters from equivalent circuit model of NC-HHP.

| NC-HHP | Rs   | R1         | Rct         |
|--------|------|------------|-------------|
| 1      | 0.41 | 7.8        | 52.9        |
| 2      | 0.43 | <b>3.4</b> | <b>37.1</b> |
| 3      | 0.38 | 8.6        | 92.0        |

**Table S5** Specific parameter value of diffusion coefficient from EIS.

|                                          | NC-HHP-1 | NC-HHP-2 | NC-HHP-3 |
|------------------------------------------|----------|----------|----------|
| R (J mol <sup>-1</sup> K <sup>-1</sup> ) |          | 8.314    |          |
| T (K)                                    |          | 298      |          |
| A (cm <sup>2</sup> )                     |          | 1        |          |
| n                                        |          | 1        |          |
| F (C mol <sup>-1</sup> )                 |          | 96500    |          |
| c (mol cm <sup>3</sup> )                 |          | 0.006    |          |
| σ                                        | 27.72    | 27.10    | 28.02    |

**Table S6** Diffusion coefficients calculated by using EIS data.

| Electrode materials                                         | Diffusion coefficient  | Ref       |
|-------------------------------------------------------------|------------------------|-----------|
| NC-HHP-1                                                    | $1.28 \times 10^{-12}$ | This work |
| NC-HHP-2                                                    | $1.34 \times 10^{-12}$ | This work |
| NC-HHP-3                                                    | $1.25 \times 10^{-12}$ | This work |
| NiCo <sub>2</sub> O <sub>4</sub> thin films                 | $4.6 \times 10^{-13}$  | [1]       |
| Ni <sub>x</sub> Co <sub>3-x</sub> O <sub>4</sub> thin films | $1.45 \times 10^{-17}$ | [1]       |
| Co-doped MnO <sub>2</sub>                                   | $1.58 \times 10^{-13}$ | [2]       |
| Layered NiCo(OH) <sub>4</sub>                               | $5.50 \times 10^{-12}$ | [3]       |
| Alkali etching CoSi-3                                       | $1.83 \times 10^{-13}$ | [4]       |
| Hierarchical CoFe <sub>2</sub> O <sub>4</sub> nanorods      | $1.30 \times 10^{-9}$  | [5]       |
| Co <sub>3</sub> (PO <sub>4</sub> ) <sub>2</sub> nanoflakes  | $5.52 \times 10^{-9}$  | [6]       |
| mesoporous STP                                              | $3.27 \times 10^{-13}$ | [7]       |

**References:**

1. R. J. Deokate, R. S. Kalubarme, C.-J. Park and C. D. Lokhande, *Electrochim Acta*, 2017, **224**, 378-385.
2. C.-L. Tang, X. Wei, Y.-M. Jiang, X.-Y. Wu, L. N. Han, K.-X. Wang and J.-S. Chen, *The Journal of Physical Chemistry C*, 2015, **119**, 8465-8471.
3. Y. Chen, W. K. Pang, H. Bai, T. Zhou, Y. Liu, S. Li and Z. Guo, *Nano Lett*, 2017, **17**, 429-436.
4. Y. Zhang, C. Wang, X. Dong, H. Jiang, T. Hu, C. Meng and C. Huang, *Chem Eng J*, 2020, DOI: 10.1016/j.cej.2020.127964.
5. S. Lalwani, R. B. Marichi, M. Mishra, G. Gupta, G. Singh and R. K. Sharma, *Electrochim Acta*, 2018, **283**, 708-717.
6. J. Theerthagiri, K. Thiagarajan, B. Senthikumar, Z. Khan, R. A. Senthil, P. Arunachalam, J. Madhavan and M. Ashokkumar, *Chemistryselect*, 2017, **2**, 201-210.
7. A. K. Tomar, G. Singh and R. K. Sharma, *J Power Sources*, 2019, **426**, 223-232.



**Table S7** Diffusion coefficients calculated by using CV data

| Electrode materials                          | Diffusion coefficient  | Ref       |
|----------------------------------------------|------------------------|-----------|
| NC-HHP-1                                     | $1.22 \times 10^{-8}$  | This work |
| NC-HHP-2                                     | $1.59 \times 10^{-8}$  | This work |
| NC-HHP-3                                     | $1.54 \times 10^{-8}$  | This work |
| NiCo <sub>2</sub> O <sub>4</sub> @rGO        | $2.43 \times 10^{-8}$  | [1]       |
| Co <sub>3</sub> O <sub>4</sub> /NiO          | $1.60 \times 10^{-12}$ | [2]       |
| NiCo <sub>2</sub> O <sub>4</sub> /NF         | $5.80 \times 10^{-12}$ | [3]       |
| NiCo <sub>2</sub> O <sub>4</sub> /NF@PPy     | $8.20 \times 10^{-12}$ | [3]       |
| NiCo <sub>2</sub> O <sub>4</sub> nanobelt    | $3.40 \times 10^{-13}$ | [4]       |
| NixCo <sub>3-x</sub> O <sub>4</sub> nanobelt | $4.60 \times 10^{-13}$ | [4]       |
| Co <sub>3</sub> O <sub>4</sub> nanoneedle    | $8.55 \times 10^{-11}$ | [5]       |
| Co <sub>3</sub> O <sub>4</sub> /Carbon paper | $5.20 \times 10^{-11}$ | [6]       |
| S-doped Co <sub>3</sub> O <sub>4</sub>       | $1.21 \times 10^{-9}$  | [7]       |
| Ni-Co-OH@Graphene                            | $1.47 \times 10^{-10}$ | [8]       |
| CoNiP nanocrystals                           | $2.64 \times 10^{-10}$ | [9]       |
| NiFe <sub>2</sub> O <sub>4</sub> /rGO        | $2.60 \times 10^{-12}$ | [10]      |

**References:**

1. A. M. Patil, N. Kitiphatpiboon, X. An, X. Hao, S. Li, X. Hao, A. Abudula and G. Guan, *ACS Appl Mater Interfaces*, 2020, **12**, 52749-52762.
2. Y. Liu, Z. Wang, Y. Zhong, X. Xu, J.-P. M. Veder, M. R. Rowles, M. Saunders, R. Ran and Z. Shao, *Chem Eng J*, 2020, **390**.
3. R. BoopathiRaja and M. Parthibavarman, *Electrochim Acta*, 2020, **346**.
4. M. Harilal, S. G. Krishnan, B. L. Vijayan, M. V. Reddy, S. Adams, A. R. Barron, M. M. Yusoff and R. Jose, *Materials & Design*, 2017, **122**, 376-384.
5. I. Hussain, J. M. Lee, S. Iqbal, H. S. Kim, S. W. Jang, J. Y. Jung, H. J. An, C. Lamiel, S. G. Mohamed, Y. R. Lee and J.-J. Shim, *Electrochim Acta*, 2020, **340**.
6. H. Wei, C. He, J. Liu, H. Gu, Y. Wang, X. Yan, J. Guo, D. Ding, N. Z. Shen, X. Wang, S. Wei and Z. Guo, *Polymer*, 2015, **67**, 192-199.
7. S. Lalwani, A. Joshi, G. Singh and R. K. Sharma, *Electrochim Acta*, 2019, **328**.
8. J. Kang, M. Hwang, K.-d. Seong, L. Lyu, D. Ko and Y. Piao, *Electrochim Acta*, 2020, **346**.
9. N. Zhang, Y. Li, J. Xu, J. Li, B. Wei, Y. Ding, I. Amorim, R. Thomas, S. M. Thalluri, Y. Liu, G. Yu and L. Liu, *ACS Nano*, 2019, **13**, 10612-10621.
10. K. Hareesh, B. Shateesh, R. P. Joshi, S. S. Dahiwal, V. N. Bhoraskar, S. K. Haram and S. D. Dhole, *Electrochim Acta*, 2016, **201**, 106-116.

**Table S8** Comparison of the capacitance and cyclic stability data of NC-HHP with published work.

| Electrode                                                                                     | Current density (A g <sup>-1</sup> ) | Specific capacity (F g <sup>-1</sup> ) | Cycling stability  | Reference |
|-----------------------------------------------------------------------------------------------|--------------------------------------|----------------------------------------|--------------------|-----------|
| <b>Hierarchical hollow Ni<sub>x</sub>Co<sub>3-x</sub>O<sub>4</sub> particles</b>              | 10                                   | 1192                                   | 99%@40000 cycles   | This work |
| NiCo <sub>2</sub> O <sub>4</sub> nanoneedles                                                  | 10                                   | 820                                    | 114%@1000 cycles   | [1]       |
| NiCo <sub>2</sub> O <sub>4</sub> -CNT nanoparticles                                           | 5                                    | 557                                    | 89.3%@5000 cycles  | [2]       |
| Hierarchical Ni(OH) <sub>2</sub> nanoflakes                                                   | 5                                    | 508                                    | 65.0%@4500 cycles  | [3]       |
| N-doped carbon@NiCo <sub>2</sub> O <sub>4</sub> nanowire                                      | 10                                   | 984                                    | 91.3%@5000 cycles  | [4]       |
| NiO@Co <sub>3</sub> O <sub>4</sub> @graphene quantum dots                                     | 10                                   | 748                                    | 76.4%@3000 cycles  | [5]       |
| Multilevel NiCo <sub>2</sub> O <sub>4</sub> /Ni nanoporous                                    | 10                                   | 708                                    | 90.8%@5000 cycles  | [6]       |
| CC/NiCo <sub>2</sub> O <sub>4</sub> @NiO nanosheets                                           | 6.15                                 | 690                                    | 90.9%@10000 cycles | [7]       |
| NiCo <sub>2</sub> O <sub>4</sub> nanosheets                                                   | 10                                   | 1093                                   | 85.8%@10000 cycles | [8]       |
| Hexagonal NiCo <sub>2</sub> O <sub>4</sub> nanostructures                                     | 10                                   | 600                                    | 98.0%@2000 cycles  | [9]       |
| Ultrathin NiCo <sub>2</sub> O <sub>4</sub> nanosheets                                         | 10                                   | 635                                    | 91.4%@5000 cycles  | [10]      |
| Core-shell NiCo <sub>2</sub> O <sub>4</sub> @Ni <sub>x</sub> Co <sub>y</sub> MoO <sub>4</sub> | 5                                    | 826                                    | 99.5%@10000 cycles | [11]      |
| Core-shell NiCo <sub>2</sub> O <sub>4</sub> @NiCo <sub>2</sub> O <sub>4</sub> nanocones       | 4                                    | 887                                    | 85.3%@21000 cycles | [12]      |
| Yolk-shelled NiCo <sub>2</sub> O <sub>4</sub> spheres                                         | 10                                   | 558                                    | 98.0%@10000 cycles | [13]      |

#### References:

1. Z. Cao, C. Liu, Y. Huang, Y. Gao, Y. Wang, Z. Li, Y. Yan and M. Zhang, *J Power Sources*, 2020, **449**.
2. Y. Xue, T. Chen, S. Song, P. Kim and J. Bae, *Nano Energy*, 2019, **56**, 751-758.
3. S. Zhang, Z. Yang, K. Gong, B. Xu, H. Mei, H. Zhang, J. Zhang, Z. Kang, Y. Yan and D. Sun, *Nanoscale*, 2019, **11**, 9598-9607.
4. Z. Xu, J. Ren, Q. Meng, X. Zhang, C. Du and J. Chen, *Acs Sustain Chem Eng*, 2019, **7**, 12447-12456.
5. X. Yin, C. Zhi, W. Sun, L.-P. Lv and Y. Wang, *J Mater Chem A*, 2019, **7**, 7800-7814.
6. B. Liu, J. Hou, T. Zhang, C. Xu and H. Liu, *J Mater Chem A*, 2019, **7**, 16222-16230.
7. Y. Ouyang, R. Huang, X. Xia, H. Ye, X. Jiao, L. Wang, W. Lei and Q. Hao, *Chem Eng J*, 2019, **355**, 416-427.
8. Z. Qu, M. Shi, H. Wu, Y. Liu, J. Jiang and C. Yan, *J Power Sources*, 2019, **410**, 179-187.
9. J. Bhagwan, G. Nagaraju, B. Ramulu, S. C. Sekhar and J. S. Yu, *Electrochim Acta*, 2019, **299**, 509-517.
10. J. Nan, Y. Shi, Z. Xiang, S. Wang, J. Yang and B. Zhang, *Electrochim Acta*, 2019, **301**, 107-116.
11. P. Sun, W. He, H. Yang, R. Cao, J. Yin, C. Wang and X. Xu, *Nanoscale*, 2018, **10**, 19004-19013.
12. X. Wang, Y. Fang, B. Shi, F. Huang, F. Rong and R. Que, *Chem Eng J*, 2018, **344**, 311-319.
13. L. Wang, X. Jiao, P. Liu, Y. Ouyang, X. Xia, W. Lei and Q. Hao, *Appl Surf Sci*, 2018, **427**, 174-181.

**Table S9** Comparison of the capacitance and cyclic stability data of NC-HHP//AC HSC device with other transition metal oxides based hybrid supercapacitors.

| Electrode                                                                 | Current density (A g <sup>-1</sup> ) | Specific capacity (F g <sup>-1</sup> ) | Cycling stability  | Reference |
|---------------------------------------------------------------------------|--------------------------------------|----------------------------------------|--------------------|-----------|
| <b>NC-HHP//AC</b>                                                         | 10                                   | 161                                    | ~100%@50000 cycles | This work |
| NiS-NiCo <sub>2</sub> O <sub>4</sub> @C//AC                               | 2                                    | 82.5                                   | 89%@5000 cycles    | [1]       |
| NiCo <sub>2</sub> O <sub>4</sub> @HfC//AC                                 | 10                                   | 132.7                                  | 94.8%@5000 cycles  | [2]       |
| P-doped NiCo <sub>2</sub> O <sub>4</sub> /rGO                             | 5                                    | 92.9                                   | 88.5%@10000 cycles | [3]       |
| NiCo <sub>2</sub> O <sub>4</sub> // NiCo <sub>2</sub> O <sub>4</sub>      | 2                                    | 73.1                                   | 86%@500 cycles     | [4]       |
| NiCo <sub>2</sub> O <sub>4</sub> @N-doped Carbon//AC                      | 5                                    | 105.1                                  | 97.3%@15000 cycles | [5]       |
| CNTs@NiCo LDH//rGO-Fe <sub>2</sub> O <sub>3</sub>                         | 2                                    | 97.1                                   | 93.5%@1000 cycles  | [6]       |
| NiCo <sub>2</sub> O <sub>4</sub> -CNT//AC                                 | 5                                    | 95                                     | 81.2%@5000 cycles  | [7]       |
| NiCo <sub>2</sub> O <sub>4</sub> @GQDs//AC                                | 4                                    | 75                                     | 71.8%@3000 cycles  | [8]       |
| Ni(OH) <sub>2</sub> //AC                                                  | 1                                    | 64                                     | 75.3%@7000 cycles  | [9]       |
| NiO@Co <sub>3</sub> O <sub>4</sub> @graphene//AC                          | 5                                    | 74.2                                   | 84.3%@10000 cycles | [10]      |
| NiCoO <sub>2</sub> /Ni//AC                                                | 10                                   | 70.8                                   | 90.5%@20000 cycles | [11]      |
| CC/NiCo <sub>2</sub> O <sub>4</sub> @NiO/graphene                         | 4                                    | 99.8                                   | 95.2%@10000 cycles | [12]      |
| NiCo <sub>2</sub> O <sub>4</sub> /NiO/Co <sub>3</sub> O <sub>4</sub> //AC | 1                                    | 100                                    | 83%@2000 cycles    | [13]      |
| Co <sub>9</sub> S <sub>8</sub> @NiCo <sub>2</sub> O <sub>4</sub> /AC      | 8                                    | 62.1                                   | 88.9%@6000 cycles  | [14]      |
| NiCo <sub>2</sub> O <sub>4</sub> //carbonized melamine                    | 5                                    | 87.8                                   | 83.6%@10000 cycles | [15]      |
| NiCo <sub>2</sub> O <sub>4</sub> /CoMoO <sub>4</sub> //AC                 | 4                                    | 49.27                                  | 71.4%@9000 cycles  | [16]      |
| NiCo <sub>2</sub> O <sub>4</sub> //superactivated carbon                  | 5                                    | 21                                     | 87%@10000 cycles   | [17]      |
| NiCo <sub>2</sub> O <sub>4</sub> //graphene hydrogel                      | 2                                    | 230                                    | 92%@5000 cycles    | [18]      |
| NiCo <sub>2</sub> O <sub>4</sub> //AC                                     | 0.25                                 | 82.5                                   | 90%@2000 cycles    | [19]      |
| NiCo <sub>2</sub> O <sub>4</sub> //PD-PC carbon                           | 5                                    | 114.6                                  | 95.5%@5000 cycles  | [20]      |
| NiMoO <sub>4</sub> /NiO//AC                                               | 0.5                                  | 95                                     | 95.5%@5000 cycles  | [21]      |
| NiCo <sub>2</sub> O <sub>4</sub> @rGO//rGO                                | 6                                    | 61.2                                   | 81.1%@10000 cycles | [22]      |
| NiCo <sub>2</sub> O <sub>4</sub> /graphene                                | 5                                    | 62.2                                   | 70.5%@10000 cycles | [23]      |
| Ni <sub>x</sub> Co <sub>3-x</sub> O <sub>4</sub> //graphene hydrogel      | 1                                    | 130                                    | 80%@5000 cycles    | [24]      |

#### References:

1. S. Ahmad, C. Yang, W. Xie, Z. Deng, H. Zhang, Y. Zhao and X. Su, *Carbon*, 2020, **158**, 912-921.
2. X. Yin, H. Li, Y. Fu, R. Yuan and J. Lu, *Chem Eng J*, 2020, **392**.
3. W. Chu, Z. Shi, Y. Hou, D. Ma, X. Bai, Y. Gao and N. Yang, *ACS Appl Mater Interfaces*, 2020, **12**, 2763-2772.
4. Z. Cao, C. Liu, Y. Huang, Y. Gao, Y. Wang, Z. Li, Y. Yan and M. Zhang, *J Power Sources*, 2020, **449**.
5. Z. Xu, J. Ren, Q. Meng, X. Zhang, C. Du and J. Chen, *Acs Sustain Chem Eng*, 2019, **7**, 12447-12456.
6. Y. Wang, H. Wei, H. Lv, Z. Chen, J. Zhang, X. Yan, L. Lee, Z. M. Wang and Y. L. Chueh, *ACS Nano*, 2019, **13**, 11235-11248.
7. Y. Xue, T. Chen, S. Song, P. Kim and J. Bae, *Nano Energy*, 2019, **56**, 751-758.
8. J. Luo, J. Wang, S. Liu, W. Wu, T. Jia, Z. Yang, S. Mu and Y. Huang, *Carbon*, 2019, **146**, 1-8.
9. S. Zhang, Z. Yang, K. Gong, B. Xu, H. Mei, H. Zhang, J. Zhang, Z. Kang, Y. Yan and D. Sun,

*Nanoscale*, 2019, **11**, 9598-9607.

10. X. Yin, C. Zhi, W. Sun, L.-P. Lv and Y. Wang, *J Mater Chem A*, 2019, **7**, 7800-7814.
11. B. Liu, J. Hou, T. Zhang, C. Xu and H. Liu, *J Mater Chem A*, 2019, **7**, 16222-16230.
12. Y. Ouyang, R. Huang, X. Xia, H. Ye, X. Jiao, L. Wang, W. Lei and Q. Hao, *Chem Eng J*, 2019, **355**, 416-427.
13. X. Feng, Y. Huang, C. Li, X. Chen, S. Zhou, X. Gao and C. Chen, *Chem Eng J*, 2019, **368**, 51-60.
14. F. Zhu, W. Liu, Y. Liu and W. Shi, *Inorg Chem Front*, 2019, **6**, 982-987.
15. Z. Qu, M. Shi, H. Wu, Y. Liu, J. Jiang and C. Yan, *J Power Sources*, 2019, **410**, 179-187.
16. W. Guo, Y. Wu, Y. Tian, X. Lian, J. Li and S. Wang, *Chemelectrochem*, 2019, **6**, 4645-4652.
17. T. Panja, N. Diez, R. Mysyk, D. Bhattacharjya, E. Goikolea and D. Carriazo, *Chemelectrochem*, 2019, **6**, 2536-2545.
18. H. Feng, S. Gao, J. Shi, L. Zhang, Z. Peng and S. Cao, *Electrochim Acta*, 2019, **299**, 116-124.
19. J. Bhagwan, G. Nagaraju, B. Ramulu, S. C. Sekhar and J. S. Yu, *Electrochim Acta*, 2019, **299**, 509-517.
20. J. Nan, Y. Shi, Z. Xiang, S. Wang, J. Yang and B. Zhang, *Electrochim Acta*, 2019, **301**, 107-116.
21. R. Xu, J. Lin, J. Wu, M. Huang, L. Fan, Z. Xu and Z. Song, *Appl Surf Sci*, 2019, **463**, 721-731.
22. K. H. Oh, G. S. Gund and H. S. Park, *J Mater Chem A*, 2018, **6**, 22106-22114.
23. L. Wang, X. Jiao, P. Liu, Y. Ouyang, X. Xia, W. Lei and Q. Hao, *Appl Surf Sci*, 2018, **427**, 174-181.
24. A. Jayakumar, R. P. Antony, R. H. Wang and J. M. Lee, *Small*, 2017, **13**, 1603102.
